# Supplementary material
Source: publisher site journal article supplement (https://iopscience.iop.org/0957-4484/27/6/065101/media/nano065101suppdata.pdf)
Supplement: Supplementary file 1 [file nano065101suppdata.pdf]

ShieldSquare Error


# Something went wrong

An error has prevented the portal from working properly.

Please contact us.

You reached this page when trying to access
**MDI3MDQ5ZTAzYjcxLTcyNDgtZjNlNC03NDRiLWRhYzdkOTUy** from
**18.223.172.252** on
**April 26 2024, 10:08:29 UTC**
